# Supplementary material for: How much do we really lose?—Yield losses in the proximity of natural landscape elements in agricultural landscapes
Source: PubMed Central journal article supplement (PMC6635954; doi:10.1002/ece3.5370), 2019-06-17

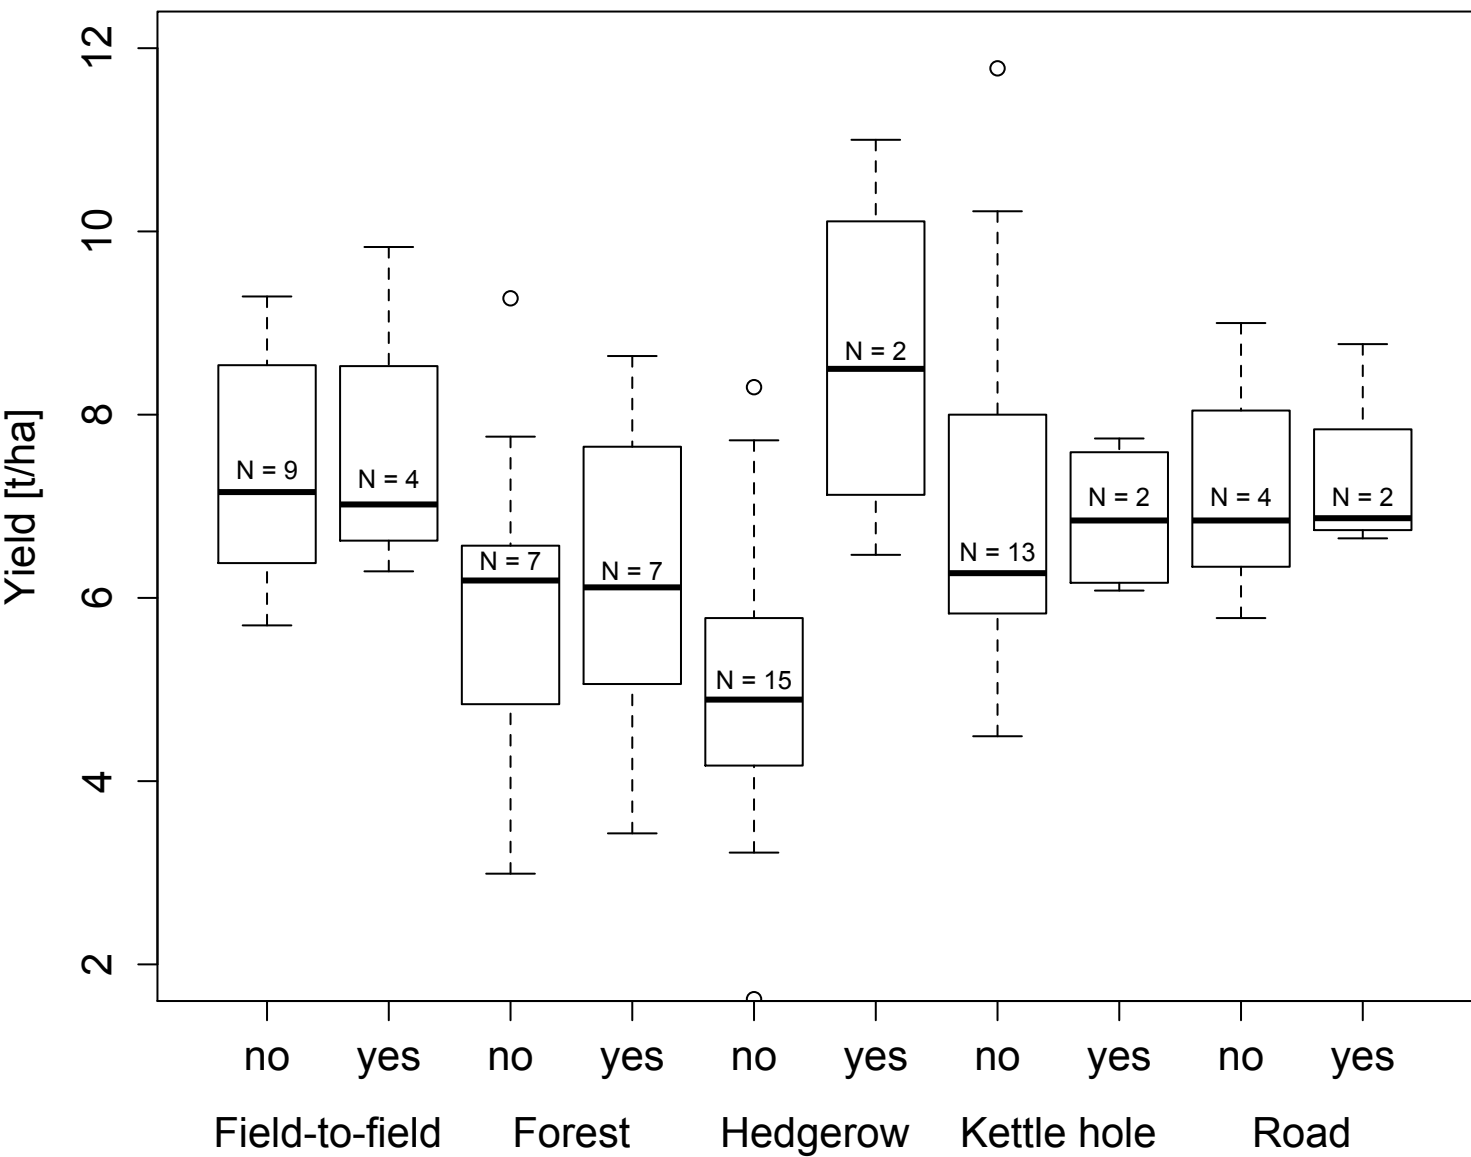

Supplement: ECE3-9-7838-s001.pdf [file ECE3-9-7838-s001.pdf]
